# Supplementary material
Source: publisher figshare collection journal article supplement (https://karger.figshare.com/ndownloader/files/8713321)
Supplement: Supplementary file 1 [file 8713321]

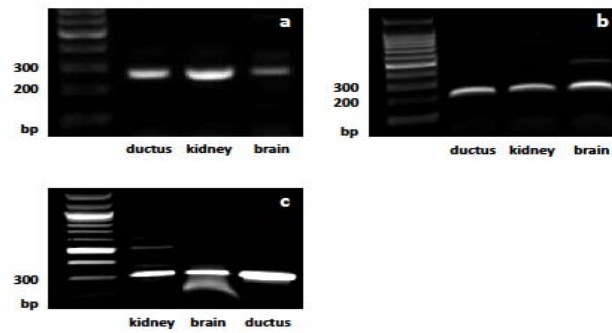

**Figure 1.** Gel electrophoresis of RT-PCR-amplified mRNA of angiotensin II (Ang II) receptor subtypes from ductus arteriosus (DA) of term fetal mouse. (a) Ang II type 1a receptor ( $AT_{1a}R$ ); (b) Ang II type 1b receptor ( $AT_{1b}R$ ); (c) Ang II type 2 receptor ( $AT_2R$ ). Kidney and brain were used as a reference. bp, Base pair.

**Supplementary Table 1.** Primer sequences for RT-PCR of Ang II receptor subtypes

|                    | Forward primer                | Reverse primer             | Product (bp) |
|--------------------|-------------------------------|----------------------------|--------------|
| AT <sub>1a</sub> R | 5'-CTCCCGGACTTAACATATGAAAG-3' | 5'-CCCACCACAAAGATGATGC-3'  | 268          |
| AT <sub>1b</sub> R | 5'-GGTCGCATGCAGGGTTATC-3'     | 5'-GGCTGGAAGTTGACCATTCC-3' | 212          |
| AT <sub>2</sub> R* | 5'-AGTGCATGCGGGAGCTG-3'       | 5'-GACAACAAAACAGTGAG-3'    | 309          |

Primer sequences were found in the literature (see asterisk) or were designed by us. AT<sub>1</sub>R, Ang II type 1 receptor; AT<sub>2</sub>R, Ang II type 2 receptor; bp, base pair.

\*Yahata Y, Shirakata Y, Tokumaru S, Yang L, Dai X, Tohyama M, Tsuda T, Sayama K, Iwai M, Horiuchi M, Hashimoto K: A novel function of angiotensin II in skin wound healing: Induction of fibroblast and keratinocyte migration by angiotensin II via heparin-binding epidermal growth factor (EGF)-like growth factor-mediated EGF receptor transactivation. J Biol Chem 2006; 281:13209-13216.
